# Supplementary material for: Photoexcited charge manipulation in conjugated polymers bearing a Ru(ii) complex catalyst for visible-light CO2 reduction
Source: Royal Society of Chemistry journal article supplement (doi:10.1039/d2ta02183h), 2022-01-01
Supplement: d2ta02183h1.pdf [file d2ta02183h1.pdf]

## Supplementary Information

### **Photoexcited charge manipulation in conjugated polymers bearing a Ru(II) complex catalyst for visible-light CO<sub>2</sub> reduction**

*Akinobu Nakada,<sup>\*a,b</sup> Ryuichi Miyakawa,<sup>a</sup> Ren Itagaki,<sup>a</sup> Kosaku Kato,<sup>c</sup> Chinami Takashima,<sup>d</sup>*

*Akinori Saeki,<sup>e</sup> Akira Yamakata,<sup>c</sup> Ryu Abe,<sup>f</sup> Hiromi Nakai,<sup>d,g,h</sup> and Ho-Chol Chang<sup>\*a</sup>*

<sup>a</sup>Department of Applied Chemistry, Faculty of Science and Engineering, Chuo University, 1-13-27 Kasuga, Bunkyo-ku, Tokyo 112-8551, Japan.

<sup>b</sup>Precursory Research for Embryonic Science and Technology (PRESTO), Japan Science and Technology Agency (JST), 4-1-8 Honcho, Kawaguchi, Saitama 332-0012, Japan.

<sup>c</sup>Graduate School of Engineering, Toyota Technological Institute, 2-12-1 Hisakata, Tempaku-ku, Nagoya 468-8511, Japan.

<sup>d</sup>Waseda Research Institute for Science and Engineering (WISE) and Department of Chemistry and Biochemistry, School of Advanced Science and Engineering, Waseda University, 3-4-1 Okubo, Shinjuku, Tokyo 169-8555, Japan.

<sup>e</sup>Department of Applied Chemistry, Graduate School of Engineering, Osaka University, 2-1 Yamadaoka, Suita, Osaka 565-0871, Japan.

<sup>f</sup>Department of Graduate School of Engineering, Kyoto University, Katsura, Nishikyo-ku, Kyoto 615-8510, Japan.

<sup>g</sup>Waseda Research Institute for Science and Engineering (WISE), Waseda University, 3-4-1 Okubo, Shinjuku, Tokyo 169-8555, Japan.

<sup>h</sup>Elements Strategy Initiative for Catalysts & Batteries (ESICB), Kyoto University, 1-30 Goryo-Ohara, Nishikyo-ku, Kyoto 615-8245, Japan.

\*E-mail: nakada@scl.kyoto-u.ac.jp (A.N.), chang@kc.chuo-u.ac.jp (H.C.)

Phone: +81-75-383-7044. Fax: +81-75-383-2479.

## Table of Contents

|      |                                                                                                         |
|------|---------------------------------------------------------------------------------------------------------|
| p.3  | <b>Fig. S1</b> MALDI-TOF-MS spectra of <b>[X-bpy]<sub>n</sub></b>                                       |
| p.4  | <b>Fig. S2-S4</b> ATR-IR spectra of <b>[X-bpyM]<sub>n</sub></b> and its model monomers                  |
| p.5  | <b>Fig. S5, S6</b> SEM images and XRD patterns of <b>[X-bpyRu]<sub>n</sub></b>                          |
| p.6  | <b>Fig. S7</b> ATR-IR spectra of <b>[Cz-bpyM]<sub>n</sub></b> synthesized by different procedure        |
| p.7  | <b>Fig. S8</b> UV-vis DRS and absorption spectra of model monomers                                      |
| p.8  | <b>Table S1</b> Calculated charge distributions of <b>X-bpyRu</b>                                       |
| p.9  | <b>Fig. S9</b> ATR-IR spectra of <b>[Cz-bpyRu]<sub>n</sub></b> before and after photocatalytic reaction |
| p.10 | <b>Fig. S10</b> Photocatalytic activities of <b>[X-bpyRu]<sub>n</sub></b> for CO <sub>2</sub> reduction |

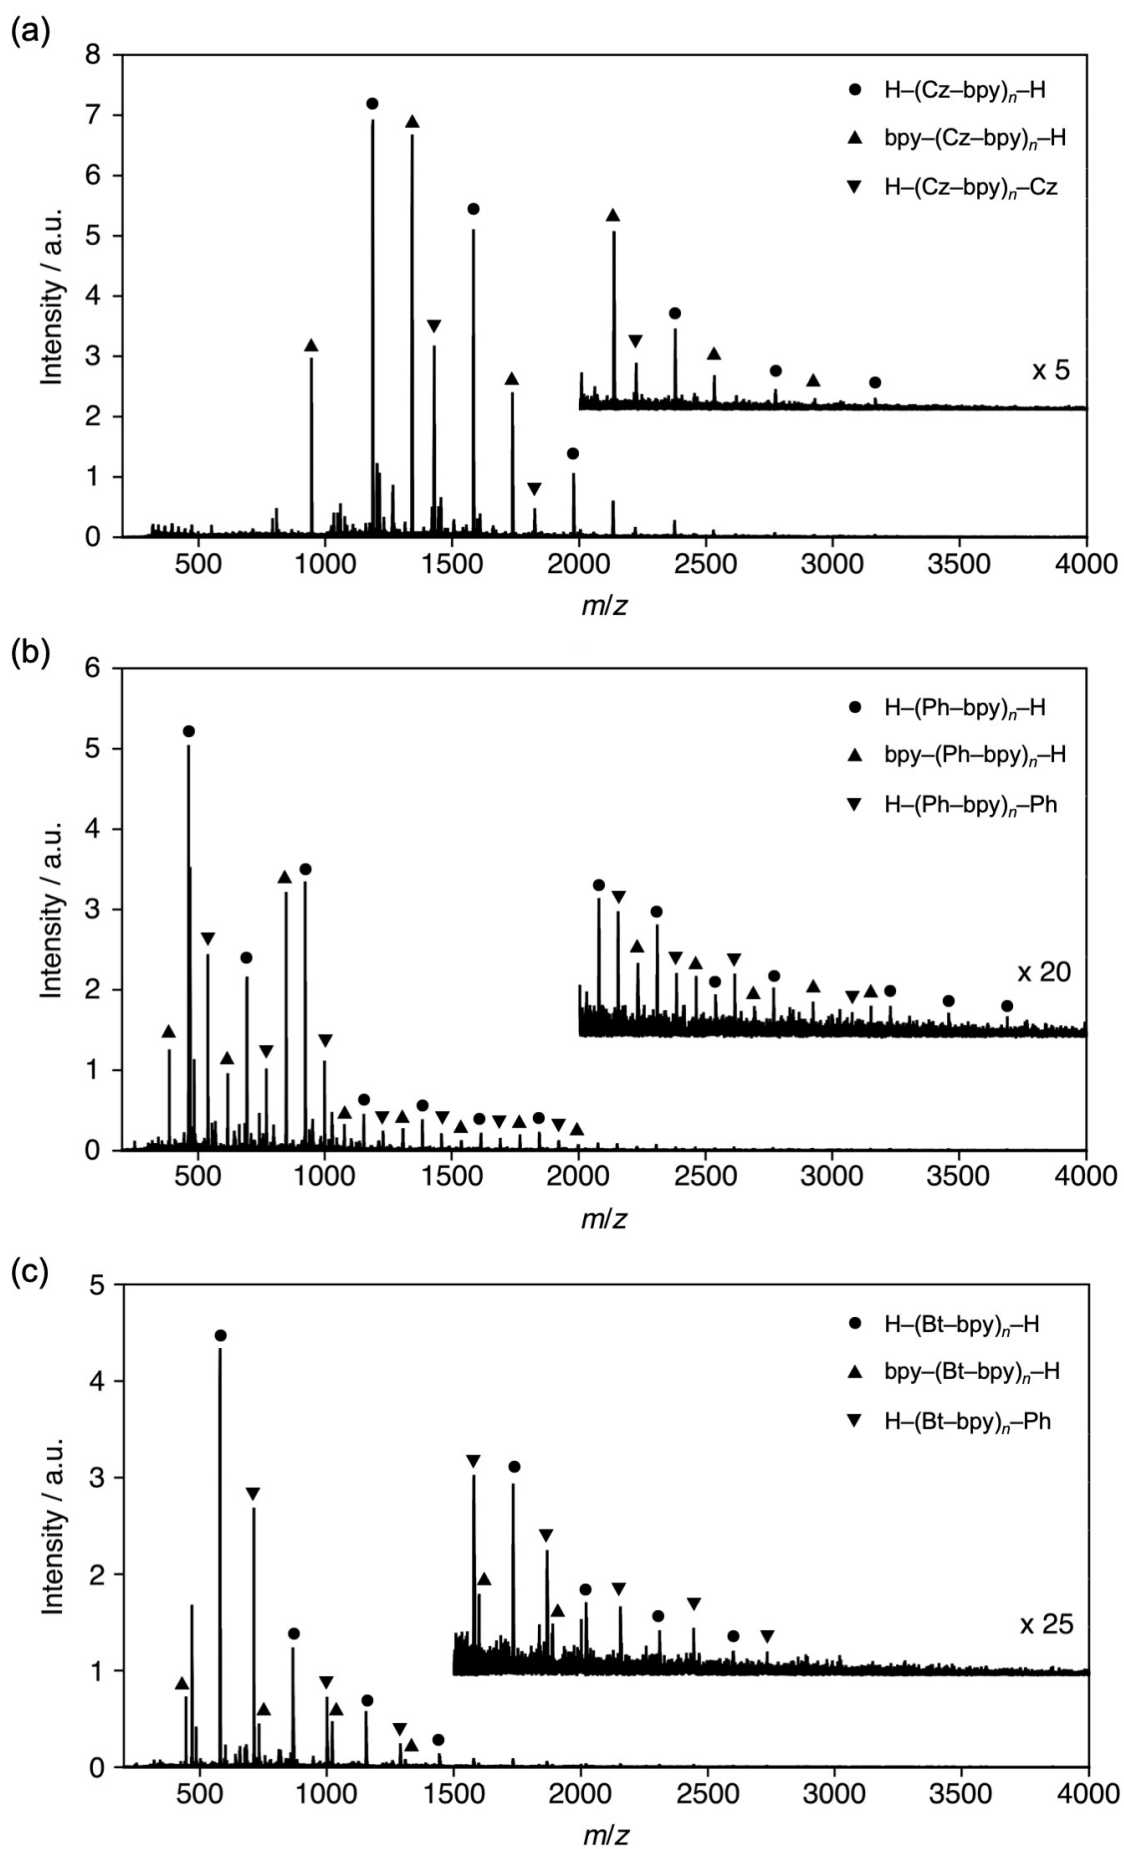

Fig. S1 MALDI-TOF-MS spectra of [X-bpy]<sub>n</sub> (X = (a) Cz, (b) Ph, or (c) Bt).

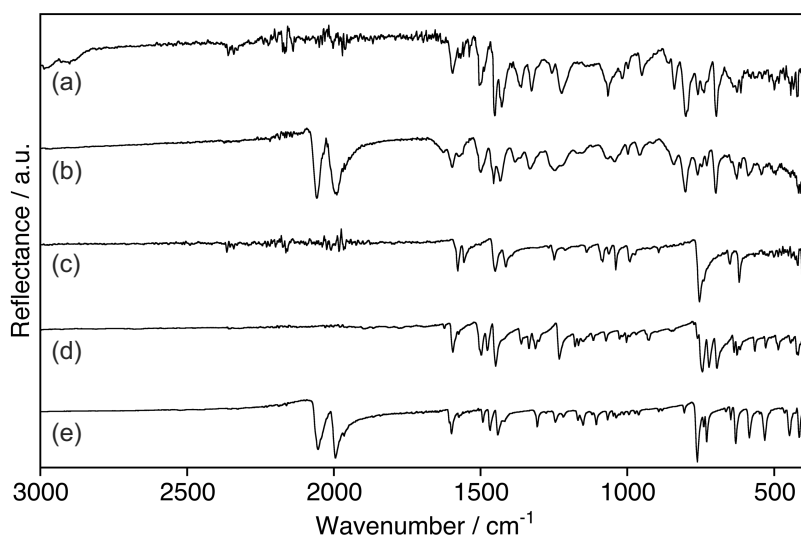

**Fig. S2** ATR-IR spectra of  $[\text{Cz-bpyM}]_n$  ( $M =$  (a) none or (b) Ru), (c) 2,2'-bipyridine, (d) 9-phenylcarbazole, and (e)  $\text{Ru}(\text{bpy})(\text{CO})_2\text{Cl}_2$ .

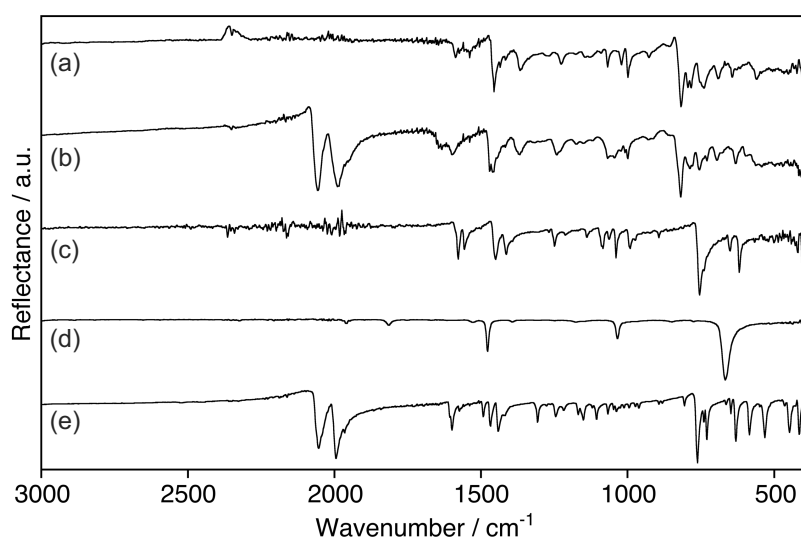

**Fig. S3** ATR-IR spectra of  $[\text{Ph-bpyM}]_n$  ( $M =$  (a) none or (b) Ru), (c) 2,2'-bipyridine, (d) benzene, and (e)  $\text{Ru}(\text{bpy})(\text{CO})_2\text{Cl}_2$ .

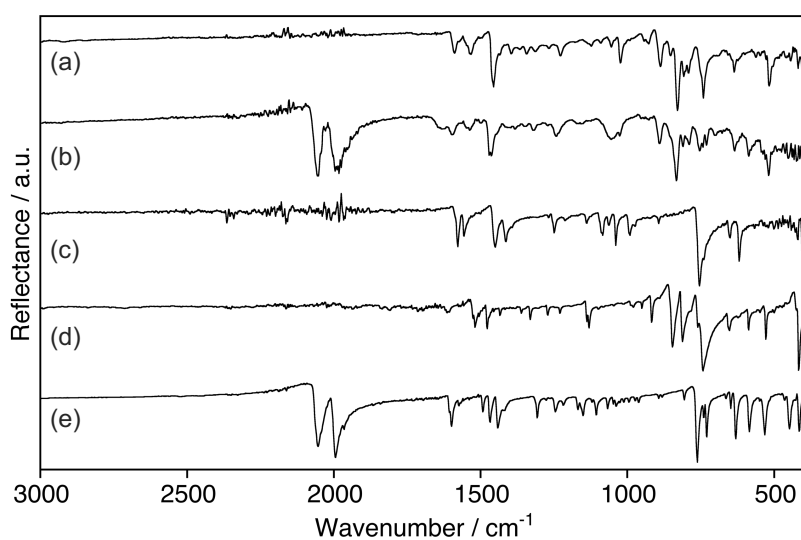

**Fig. S4** ATR-IR spectra of  $[\text{Bt-bpyM}]_n$  ( $M =$  (a) none or (b) Ru), (c) 2,2'-bipyridine, (d) 2,1,3-benzothiadiazole, and (e)  $\text{Ru}(\text{bpy})(\text{CO})_2\text{Cl}_2$ .

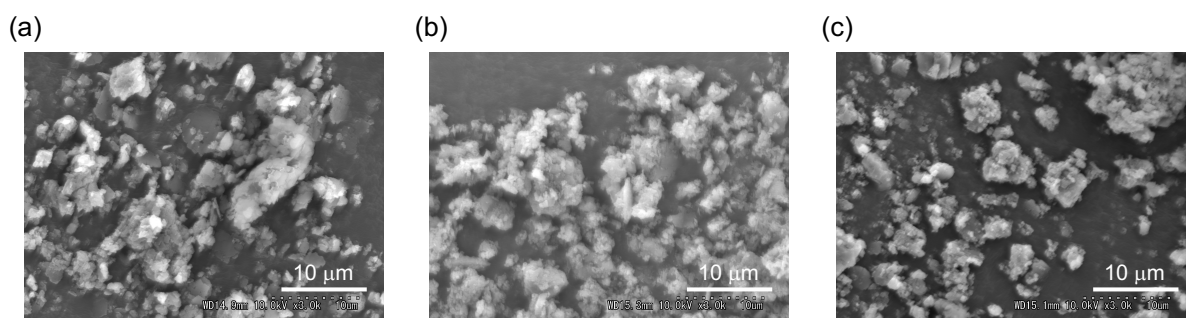

**Fig. S5** SEM images of  $[X\text{-bpyRu}]_n$  ( $X =$  (a) Cz, (b) Ph, or (c) Bt).

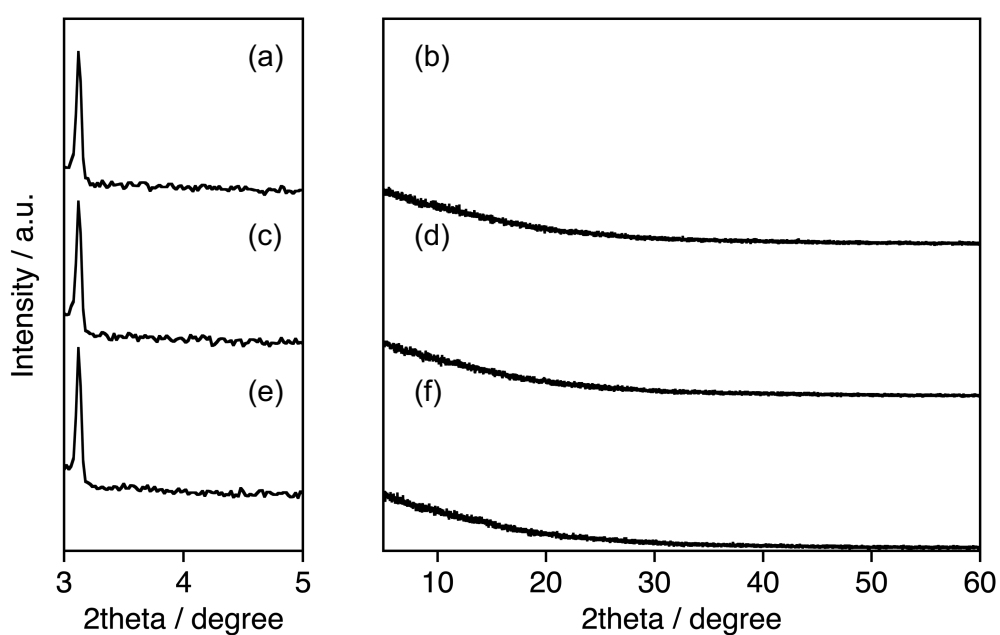

**Fig. S6** XRD patterns of  $[X\text{-bpyRu}]_n$  ( $X =$  (a,b) Cz, (c,d) Ph, or (e,f) Bt) in ranges of (a,c,e) 3-5 degree and (b,d,f) 5-60 degree.

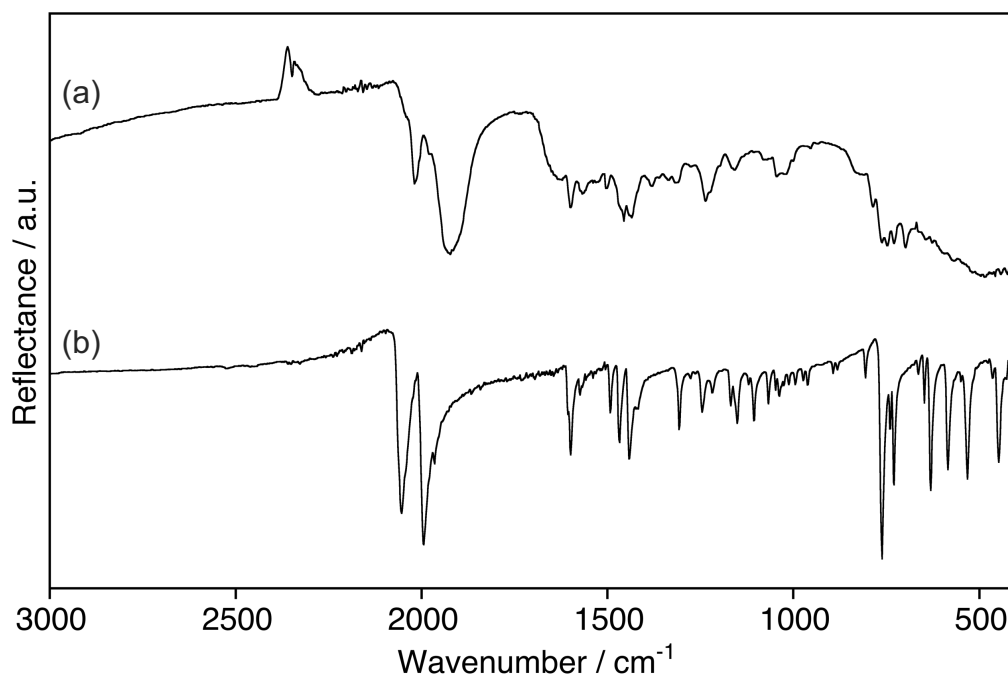

**Fig. S7** ATR-IR spectra of (a)  $[\text{Cz-bpyRu}]_n$ , which is synthesized from  $\text{Ru}(\text{Br}_2\text{bpy})(\text{CO})_2\text{Cl}_2$  and  $\text{Cz-B}(\text{OR})_2$ , and (b)  $\text{Ru}(\text{bpy})(\text{CO})_2\text{Cl}_2$ .

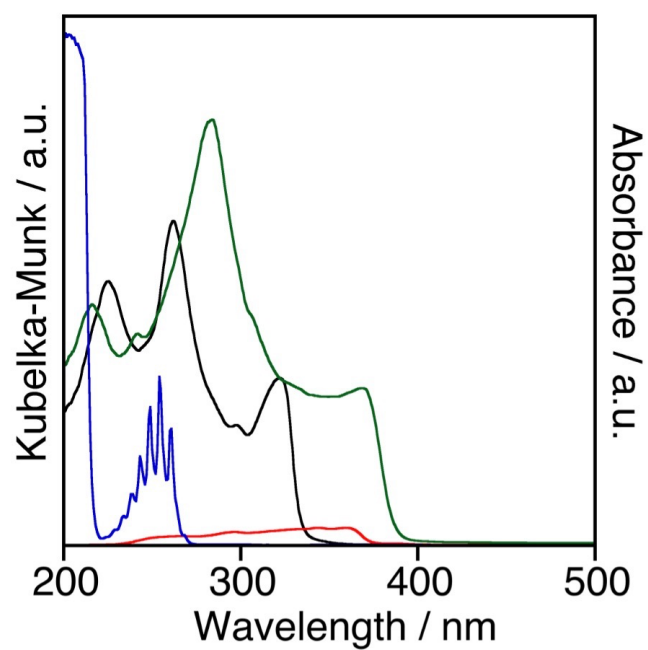

**Fig. S8** UV-vis DRS of 2,2'-bipyridine (black), 9-phenylcarbazole (red), 2,1,3-benzothiadiazole (green), and UV-vis absorption spectrum of benzene in MeCN (blue).

**Table R1.** Charge distributions of **X-bpyRu** (X = Cz, Ph, and Bt) in the  $S_0$  and  $T_1$  states obtained by Mulliken population analysis.  $\Delta$  represents the deviations of the  $T_1$  values from the  $S_0$  ones.

|      | <b>Cz-bpyRu</b> |        |          | <b>Ph-bpyRu</b> |        |          | <b>Bt-bpyRu</b> |        |          |
|------|-----------------|--------|----------|-----------------|--------|----------|-----------------|--------|----------|
|      | $S_0$           | $T_1$  | $\Delta$ | $S_0$           | $T_1$  | $\Delta$ | $S_0$           | $T_1$  | $\Delta$ |
| X    | 0.072           | 0.129  | 0.057    | 0.051           | 0.051  | -0.001   | 0.019           | -0.002 | -0.021   |
| bpyM | -0.072          | -0.129 | -0.057   | -0.051          | -0.051 | 0.001    | -0.019          | 0.002  | 0.021    |



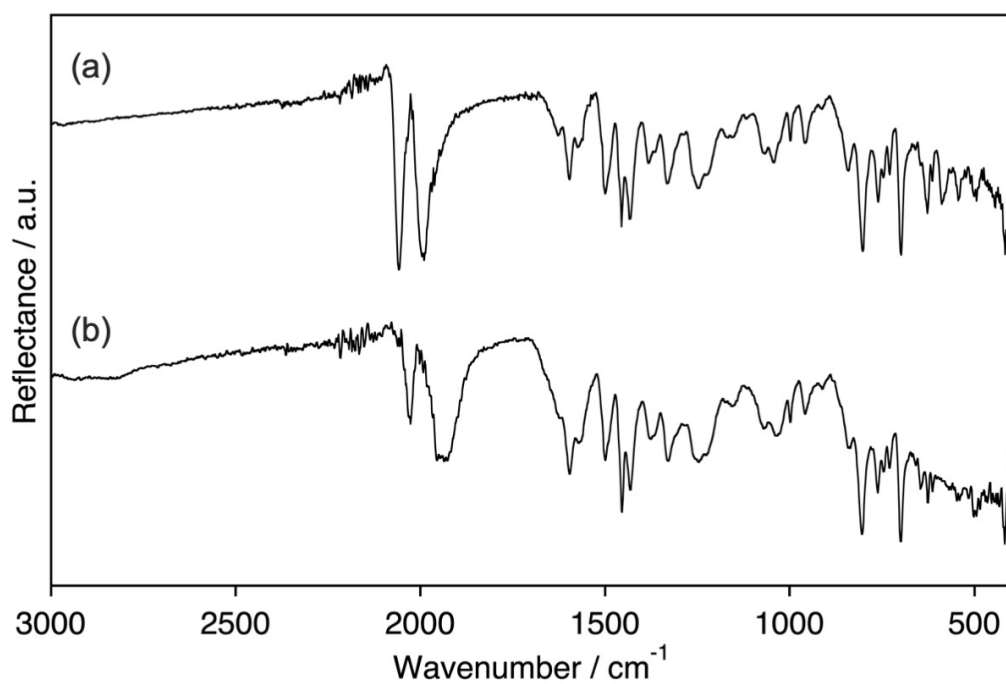

**Fig. S9** ATR-IR spectra of [Cz-bpyRu]<sub>n</sub> (a) before and (b) after photocatalysis at  $\lambda > 400$  nm for 12 h.

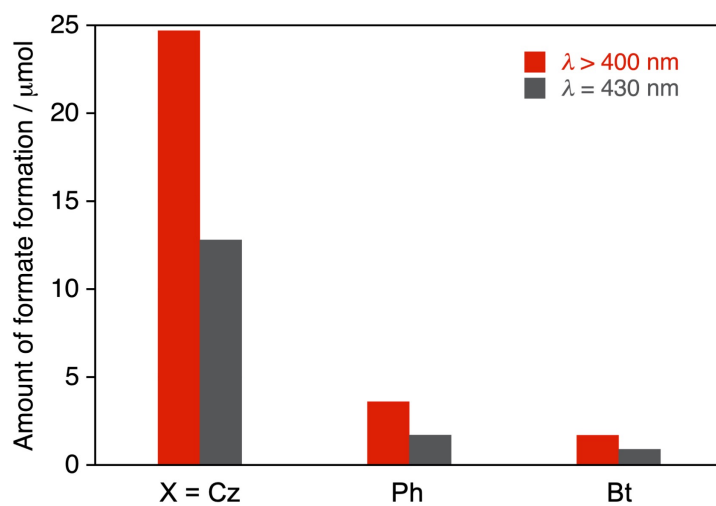

**Fig. S10** Photocatalytic activities of  $[X\text{-bpyRu}]_n$  for formate formation under a  $\text{CO}_2$  atmosphere upon irradiation at  $\lambda > 400$  nm (red) or  $\lambda = 430$  nm (gray). 2 mg of each photocatalyst powder in an MeCN-TEOA (2 mL; 4:1 v/v) dispersion was irradiated for 12 h.
